# Supplementary material for: Navigating through the PD-1/PDL-1 Landscape: A Systematic Review and Meta-Analysis of Clinical Outcomes in Hepatocellular Carcinoma and Their Influence on Immunotherapy and Tumor Microenvironment
Source: MDPI journal article supplement (doi:10.3390/ijms24076495), 2023-03-30
Supplement: s1 [file s1]

Table S1 Phase I clinical trials of immune checkpoint inhibitors for HCC.

| Regimen                                                        | Starting date      | completion date    | Patients | Trial name/number |
|----------------------------------------------------------------|--------------------|--------------------|----------|-------------------|
| FGF401, PDR001                                                 | December 29, 2014  | May 30, 2019       | 172      | NCT02325739       |
| Vaccinia Virus Ankara Vaccine<br>Expressing p53, Pembrolizumab | June 14, 2016      | December 31, 2022  | 19       | NCT02432963       |
| SF1126, Nivolumab                                              | March 27, 2017     | June 29, 2020      | 7        | NCT03059147       |
| INCAGN01876, Nivolumab, Ipilimumab                             | April 25, 2017     | November 9, 2021   | 145      | NCT03126110       |
| Nab-Rapamycin, Nivolumab                                       | August 24, 2017    | December 2, 2021   | 34       | NCT03190174       |
| Toripalimab                                                    | March 14, 2018     | August 2023        | 198      | NCT03474640       |
| Cabozantinib, Durvalumab,<br>Tremelimumab                      | October 22, 2018   | June 30, 2023      | 117      | NCT03539822       |
| TQB2450, Anlotinib                                             | April 23, 2019     | January 1, 2021    | 60       | NCT03825705       |
| JS001                                                          | May 1, 2019        | October 31, 2022   | 20       | NCT03966209       |
| GB1275, Pembrolizumab                                          | August 13, 2019    | April 11, 2022     | 61       | NCT04060342       |
| Regorafenib + Nivolumab                                        | March 16, 2020     | August 2024        | 78       | NCT04170556       |
| Camrelizumab                                                   | September 21, 2020 | July 2023          | 20       | NCT04564313       |
| OC-001                                                         | October 6, 2020    | November 2022      | 80       | NCT05339321       |
| Anlotinib hydrochloride + TQB2450                              | April 30, 2021     | July 30, 2024      | 20       | NCT04888546       |
| Poly ICLC                                                      | October 1, 2021    | September 30, 2024 | 10       | NCT04260802       |
| PF-07263689, Sasanlimab                                        | October 20, 2021   | December 6, 2022   | 10       | NCT05061537       |
| Ipilimumab + pembrolizumab +<br>durvalumab                     | November 1, 2021   | October 30, 2025   | 100      | NCT05187338       |

Table S2 Phase II clinical trials of immune checkpoint inhibitors for HCC.

| Regimen                                                                                                                                                                                                                                                                               | Starting date     | completion date    | Patients | Trial number |
|---------------------------------------------------------------------------------------------------------------------------------------------------------------------------------------------------------------------------------------------------------------------------------------|-------------------|--------------------|----------|--------------|
| Pembrolizumab                                                                                                                                                                                                                                                                         | May 31, 2016      | December 30, 2023  | 156      | NCT02702414  |
| Durvalumab, Tremelimumab                                                                                                                                                                                                                                                              | July 5, 2016      | December 31, 2022  | 54       | NCT02821754  |
| Pembrolizumab                                                                                                                                                                                                                                                                         | February 15, 2018 | December 31, 2023  | 30       | NCT03316872  |
| PD-1 mAb, PolyIC                                                                                                                                                                                                                                                                      | October 22, 2018  | October 22, 2023   | 60       | NCT03732547  |
| Cabozantinib, Durvalumab, Tremelimumab                                                                                                                                                                                                                                                | October 22, 2018  | June 30, 2023      | 117      | NCT03539822  |
| Pembrolizumab                                                                                                                                                                                                                                                                         | November 1, 2018  | November 1, 2033   | 200      | NCT03755739  |
| N-803 + Pembrolizumab, N-803 + Nivolumab, N-803 + Atezolizumab, N-803 + Avelumab, N-803 + Durvalumab, N-803 + Pembrolizumab + PD-L1 t-haNK, N-803 + Nivolumab + PD-L1 t-haNK, N-803 + Atezolizumab + PD-L1 t-haNK, N-803 + Avelumab + PD-L1 t-haNK, N-803 + Durvalumab + PD-L1 t-haNK | December 11, 2018 | December 2023      | 147      | NCT03228667  |
| TQB2450, Anlotinib                                                                                                                                                                                                                                                                    | April 23, 2019    | January 1, 2021    | 60       | NCT03825705  |
| IMC-001                                                                                                                                                                                                                                                                               | September 9, 2019 | September 26, 2026 | 48       | NCT04196465  |
| Sintilimab                                                                                                                                                                                                                                                                            | November 16, 2019 | October 31, 2022   | 116      | NCT04167293  |
| Cabozantinib                                                                                                                                                                                                                                                                          | January 30, 2020  | September 2023     | 46       | NCT04435977  |
| Regorafenib, Nivolumab                                                                                                                                                                                                                                                                | March 16, 2020    | August 2024        | 78       | NCT04170556  |
| axitinib plus toripalimab                                                                                                                                                                                                                                                             | May 1, 2020       | June 30, 2022      | 60       | NCT04010071  |
| Durvalumab                                                                                                                                                                                                                                                                            | October 5, 2020   | December 31, 2025  | 18       | NCT04108481  |
| Durvalumab                                                                                                                                                                                                                                                                            | October 15, 2020  | December 31, 2024  | 37       | NCT04913480  |
| Sintilimab                                                                                                                                                                                                                                                                            | December 26, 2020 | December 1, 2021   | 10       | NCT04653389  |
| Pembrolizumab + Regorafenib (Stivarga, BAY73-4506)                                                                                                                                                                                                                                    | February 3, 2021  | May 15, 2024       | 95       | NCT04696055  |
| oxaliplatin, fluorouracil, and leucovorin                                                                                                                                                                                                                                             | July 1, 2021      | December 31, 2022  | 49       | NCT04994236  |
| Regorafenib, Camrelizumab, Toripalimab, Pembrolizumab                                                                                                                                                                                                                                 | October 1, 2021   | December 1, 2022   | 20       | NCT05048017  |
| ipilimumab +pembrolizumab +durvalumab                                                                                                                                                                                                                                                 | November 1, 2021  | October 30, 2025   | 100      | NCT05187338  |
| Cabozantinib                                                                                                                                                                                                                                                                          | December 14, 2021 | December 14, 2024  | 40       | NCT04767906  |
| pembrolizumab, Sintilimab, Camrelizumab, Duvarizumab                                                                                                                                                                                                                                  | April 10, 2022    | December 31, 2023  | 15       | NCT05322187  |
| Durvalumab                                                                                                                                                                                                                                                                            | April 11, 2022    | December 30, 2023  | 30       | NCT04945720  |
| Regorafenib, Toripalimab                                                                                                                                                                                                                                                              | July 25, 2022     | June 30, 2024      | 32       | NCT05485909  |
| Envafolimab, Lenvatinib Combined With TACE                                                                                                                                                                                                                                            | October 30, 2022  | October 30, 2025   | 30       | NCT05582109  |
| Durvalumab, Lenvatinib                                                                                                                                                                                                                                                                | April 2023        | June 2024          | 25       | NCT05312216  |
